# Supplementary material for: Loss of microglial MCT4 leads to defective synaptic pruning and anxiety-like behavior in mice
Source: PubMed Central journal article supplement (PMC10505217; doi:10.1038/s41467-023-41502-4), 2023-09-16

## Supplementary Figures

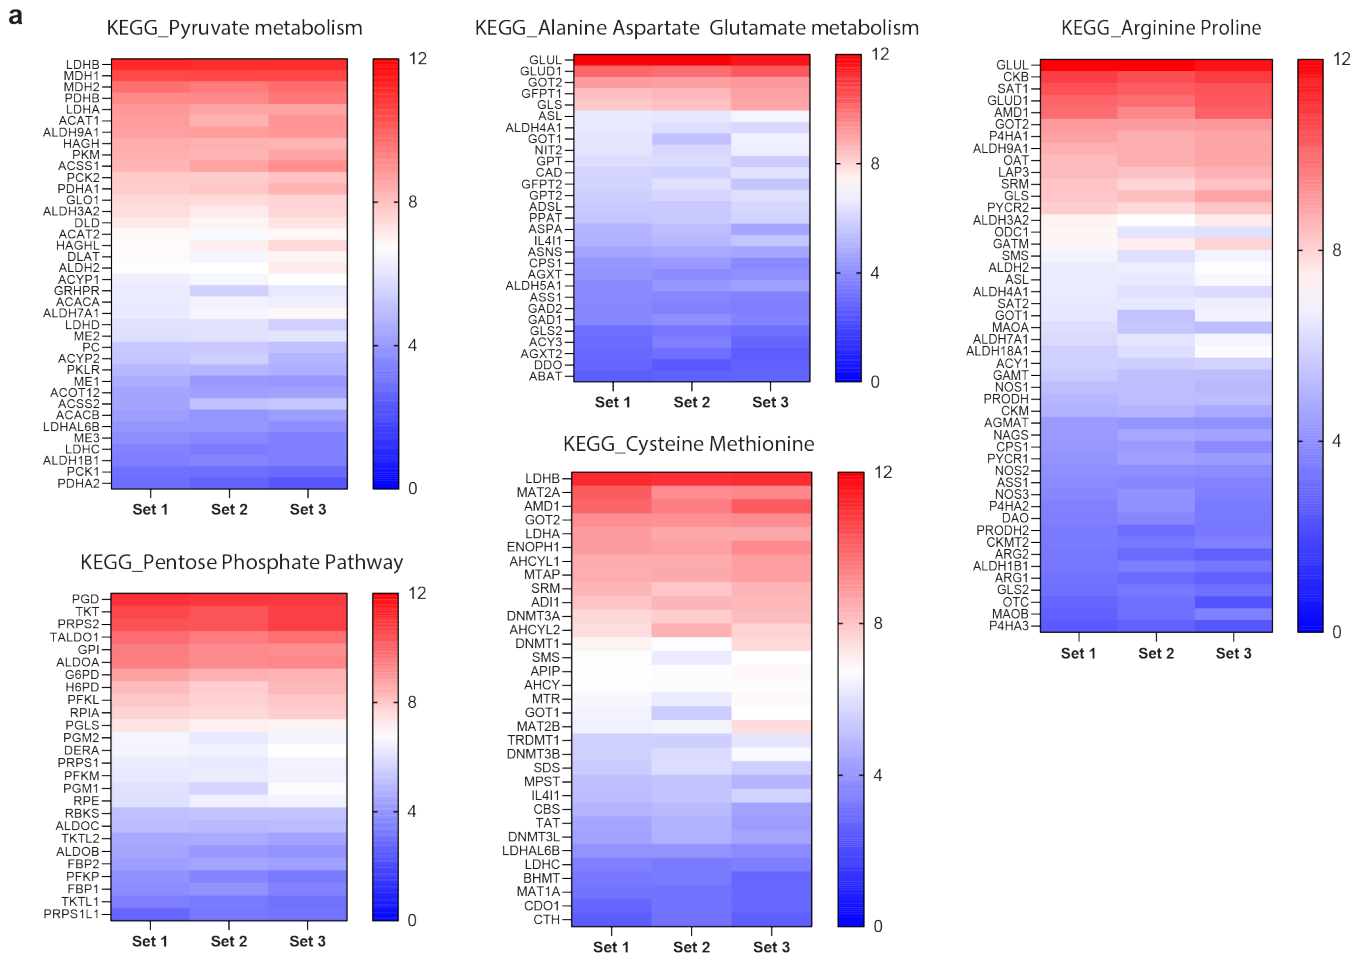

**b**

| Metabolic pathway                               | Microglia_compared_to | P-value   |
|-------------------------------------------------|-----------------------|-----------|
| KEGG_PENTOSE_PHOSPHATE_PATHWAY                  | Astrocytes            | 0.500405  |
| KEGG_PENTOSE_PHOSPHATE_PATHWAY                  | Oligodendrocytes      | 1.11E-18  |
| KEGG_PENTOSE_PHOSPHATE_PATHWAY                  | Neurons               | 3.98E-23  |
| KEGG_ALANINE_ASPARTATE_AND_GLUTAMATE_METABOLISM | Astrocytes            | 8.64E-41  |
| KEGG_ALANINE_ASPARTATE_AND_GLUTAMATE_METABOLISM | Oligodendrocytes      | 8.62E-54  |
| KEGG_ALANINE_ASPARTATE_AND_GLUTAMATE_METABOLISM | Neurons               | 4.43E-06  |
| KEGG_PYRUVATE_METABOLISM                        | Astrocytes            | 0.227298  |
| KEGG_PYRUVATE_METABOLISM                        | Oligodendrocytes      | 1.27E-17  |
| KEGG_PYRUVATE_METABOLISM                        | Neurons               | 4.66E-37  |
| KEGG_FATTY_ACID_METABOLISM                      | Astrocytes            | 3.75E-32  |
| KEGG_FATTY_ACID_METABOLISM                      | Oligodendrocytes      | 8.11E-06  |
| KEGG_FATTY_ACID_METABOLISM                      | Neurons               | 7.32E-35  |
| KEGG_OXIDATIVE_PHOSPHORYLATION                  | Astrocytes            | 1.01E-208 |
| KEGG_OXIDATIVE_PHOSPHORYLATION                  | Oligodendrocytes      | 9.00E-170 |
| KEGG_OXIDATIVE_PHOSPHORYLATION                  | Neurons               | 0         |
| KEGG_GLYCOLYSIS_GLUONEOGENESIS                  | Astrocytes            | 1.85E-29  |
| KEGG_GLYCOLYSIS_GLUONEOGENESIS                  | Oligodendrocytes      | 1.35E-139 |
| KEGG_GLYCOLYSIS_GLUONEOGENESIS                  | Neurons               | 9.95E-120 |

**Supplementary Figure 1: Microglial transcriptome indicates high potential for metabolic flexibility.**

**(a)** Transcriptional basis for microglia metabolic flexibility. Heatmaps of the microglial expression levels of genes annotated within substrate metabolism-related KEGG-pathways. Data were obtained from the dataset published in Pinto et al. 2012<sup>26</sup>, from three independent experiments, shown as normalized intensity values. **(b)** Exact p-values calculated with Wilcoxon statistical test (two-tailed) for all comparisons between hippocampal cell populations, as shown in Figure 1b.

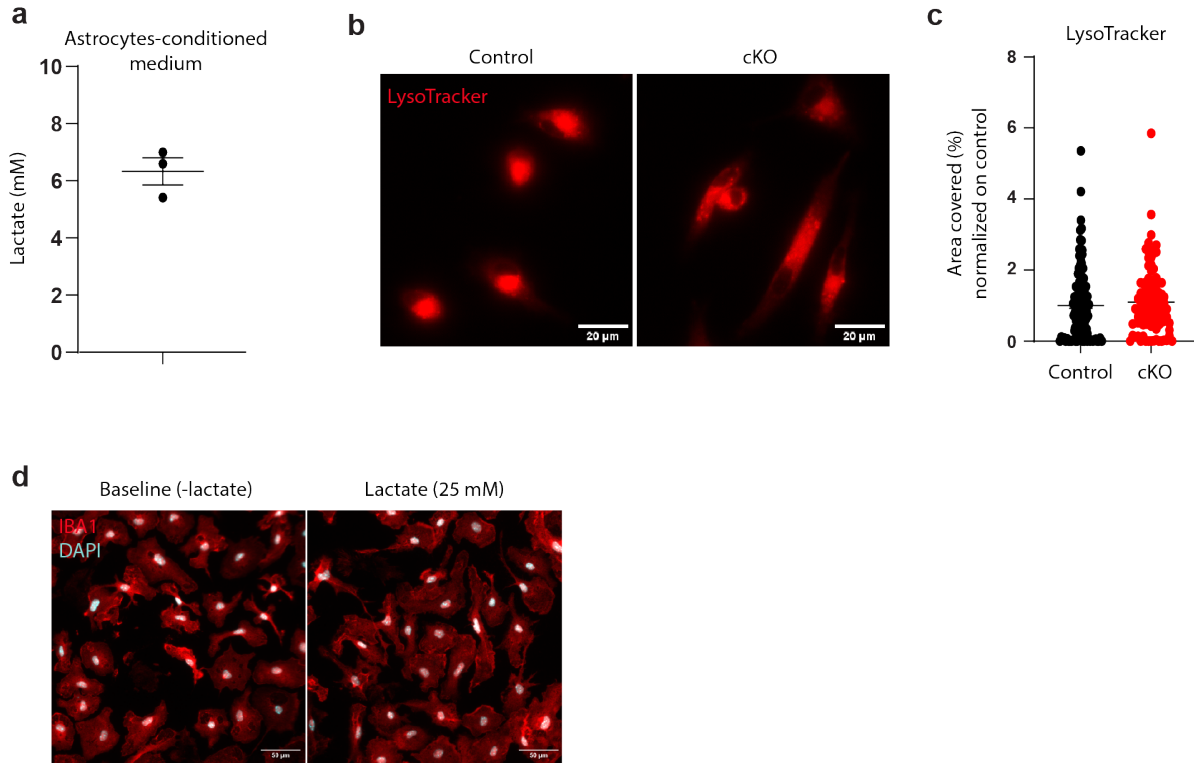

**Supplementary Figure 2: Microglia are not stressed upon lactate treatment and extracellular lactate drives the lysosomal differences observed in presence or absence of MCT4**

**(a)** Lactate content in astrocytes-conditioned medium, with 24h conditioning. Lactate concentration (mM) was measured taking advantage of an enzymatic-spectrophotometric method, as described by Rosenberg and Rush<sup>35</sup>. **(b)** Representative z-stack projections of LysoTracker staining in control and cKO primary microglia cultured in lactate-free medium (scale bar: 20μm) and **(c)** relative quantification of area covered by LysoTracker signal, normalized to controls. Data points represent individual cells from N=2 independent experiments. Control: n=52 cells; cKO: n=52 cells. **(d)** Representative images of primary microglia (IBA1+) at baseline or supplemented with sodium lactate (25mM) for 24h; Scale bar: 50μm. The purity of the cultures was at least 95%. No major morphological changes nor cellular stress hallmarks were observed across conditions.

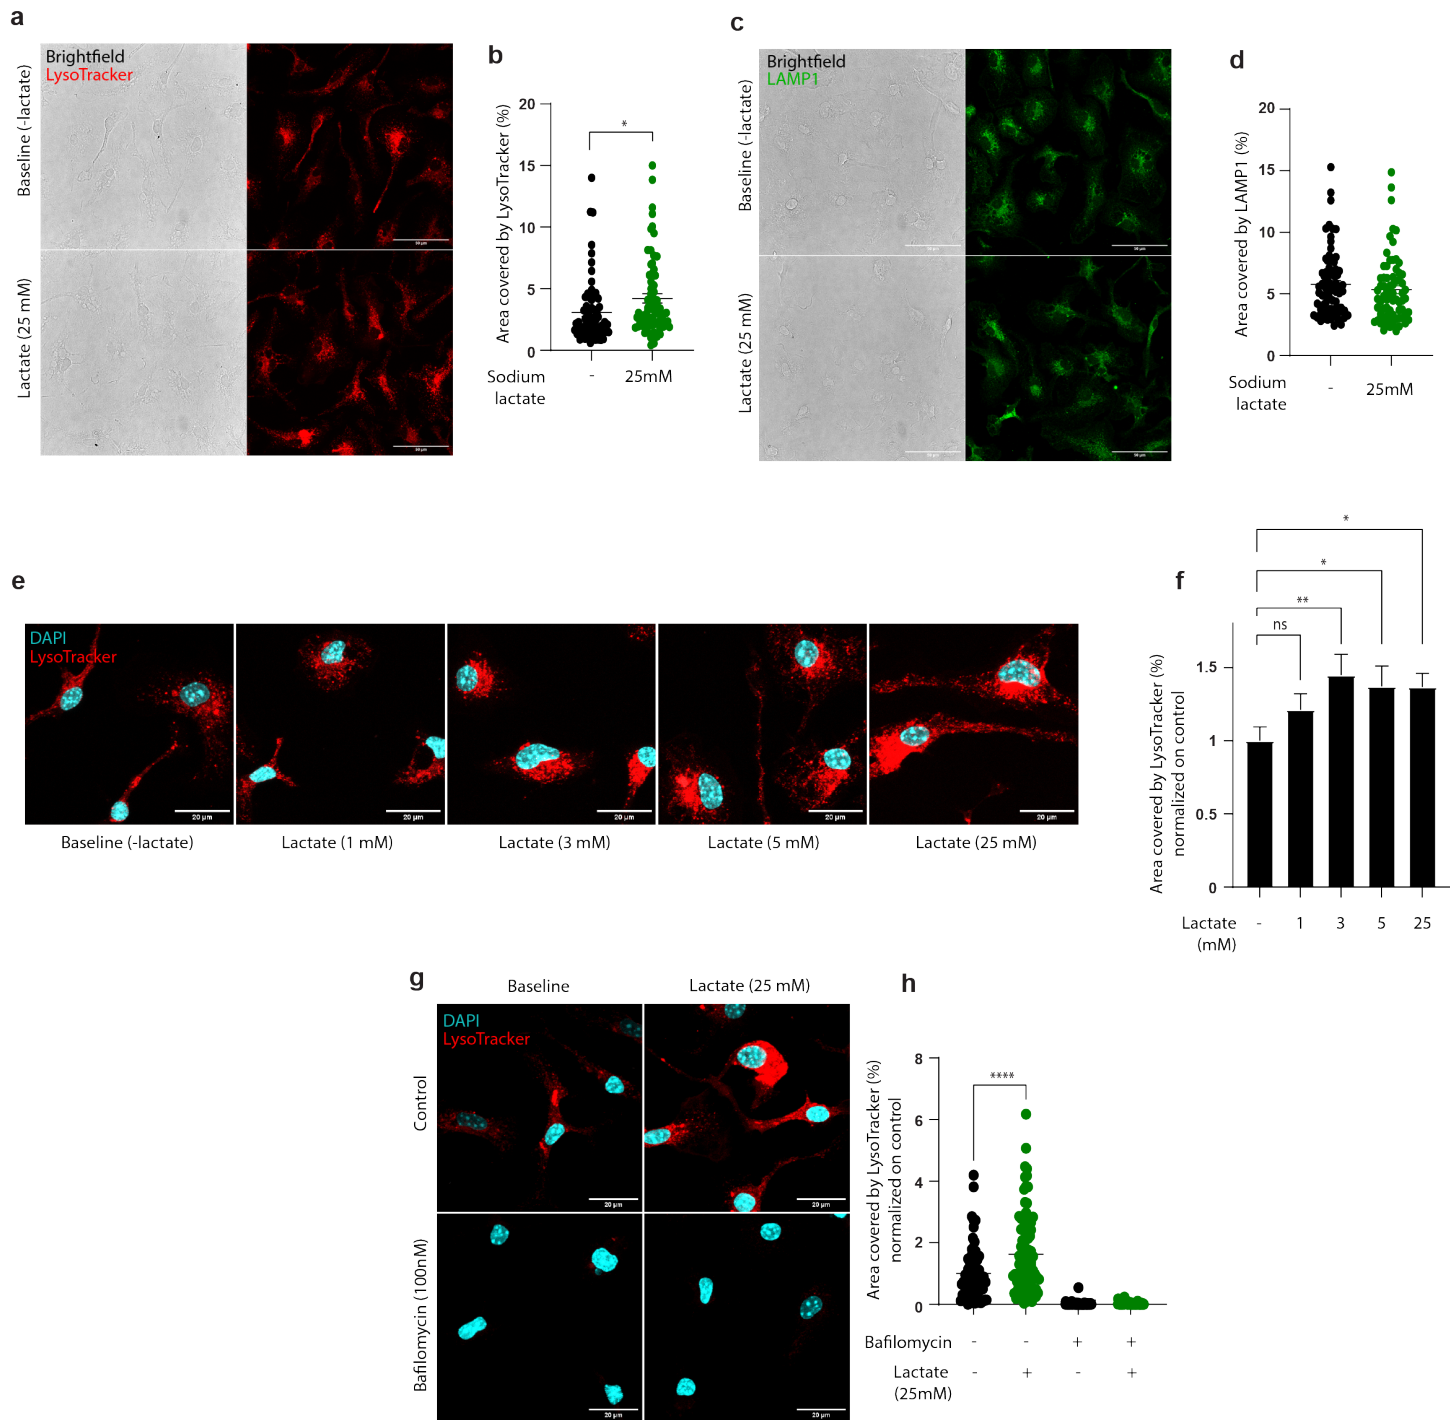

**Supplementary Figure 3: Lactate-driven lysosomal acidification in microglia is dose- and vATPase-dependent, and it is not accompanied by alterations in the LAMP1+ vesicles pool**

**(a)** Representative confocal z-stack projections of LysoTracker labelling in wild-type primary microglia, treated with control medium or 25mM lactate-containing medium. Scale bar: 50 $\mu$ m. **(b)** Quantification of area covered by LysoTracker in control or lactate-treated primary microglia. Each data point represents

an individual cell, control: n=66 cells; lactate 25mM: n=70 cells from N=2 independent experiments. Two-tailed unpaired t-test. \*p=0.0254. **(c)** Representative confocal z-stack projections of LAMP1+ structures in wild-type primary microglia, treated with control medium or 25mM lactate-containing medium. Scale bar: 50µm. **(d)** Quantification of area covered by LAMP1 in control or lactate-treated primary microglia. Each data point represents an individual cell, control: n=75 cells; lactate 25mM: n=70 cells from N=3 independent experiments. **(e)** Representative confocal z-stack projections and **(f)** relative quantification of LysoTracker labelling in wild-type primary microglia, treated with control medium or increasing concentration of lactate. Scale bar: 20µm. Data points represent individual cells from N=2 independent experiments. Baseline (-lactate): n=51 cells, Lactate (1mM): n=58 cells; Lactate (3mM): n=59 cells; Lactate (5mM): n=58 cells; Lactate (25mM): n=66 cells. One-way ANOVA, uncorrected Fisher LSD test. \*\*p(control:lactate3mM) = 0.0097; \*p(control:lactate5mM) = 0.0326; \*p(control:lactate25mM) = 0.0301. **(g)** Representative confocal z-stack projections and **(h)** relative quantification of LysoTracker labelling in wild-type primary microglia, treated with control medium or 25mM lactate-containing medium in presence or absence of bafilomycin (100nM, vATPase inhibitor). Scale bar: 20µm. Each data point represents an individual cell, Control-Baseline: n=65 cells; Control-lactate 25mM: n=91 cells; Bafilomycin-Baseline: n=75 cells; Bafilomycin-lactate 25mM: n=71 cells from N=2 independent experiments. Two-tailed unpaired t-test. \*\*\*\*p < 0.0001.

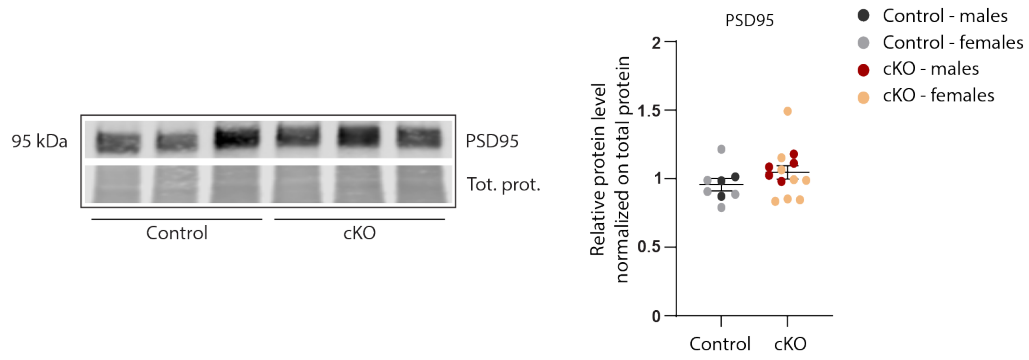

**Supplementary Figure 4: PSD95 protein content is not altered in the cKO hippocampus at P15**

Representative PSD95 western blots of hippocampal homogenates from P15 control and cKO mice and relative quantification. normalized to the control group. Each data point corresponds to one animal. Control: N=3 males; N=5 females; cKO: N=5 males; N=8 females. Two-tailed unpaired t-test.

## Glycolysis

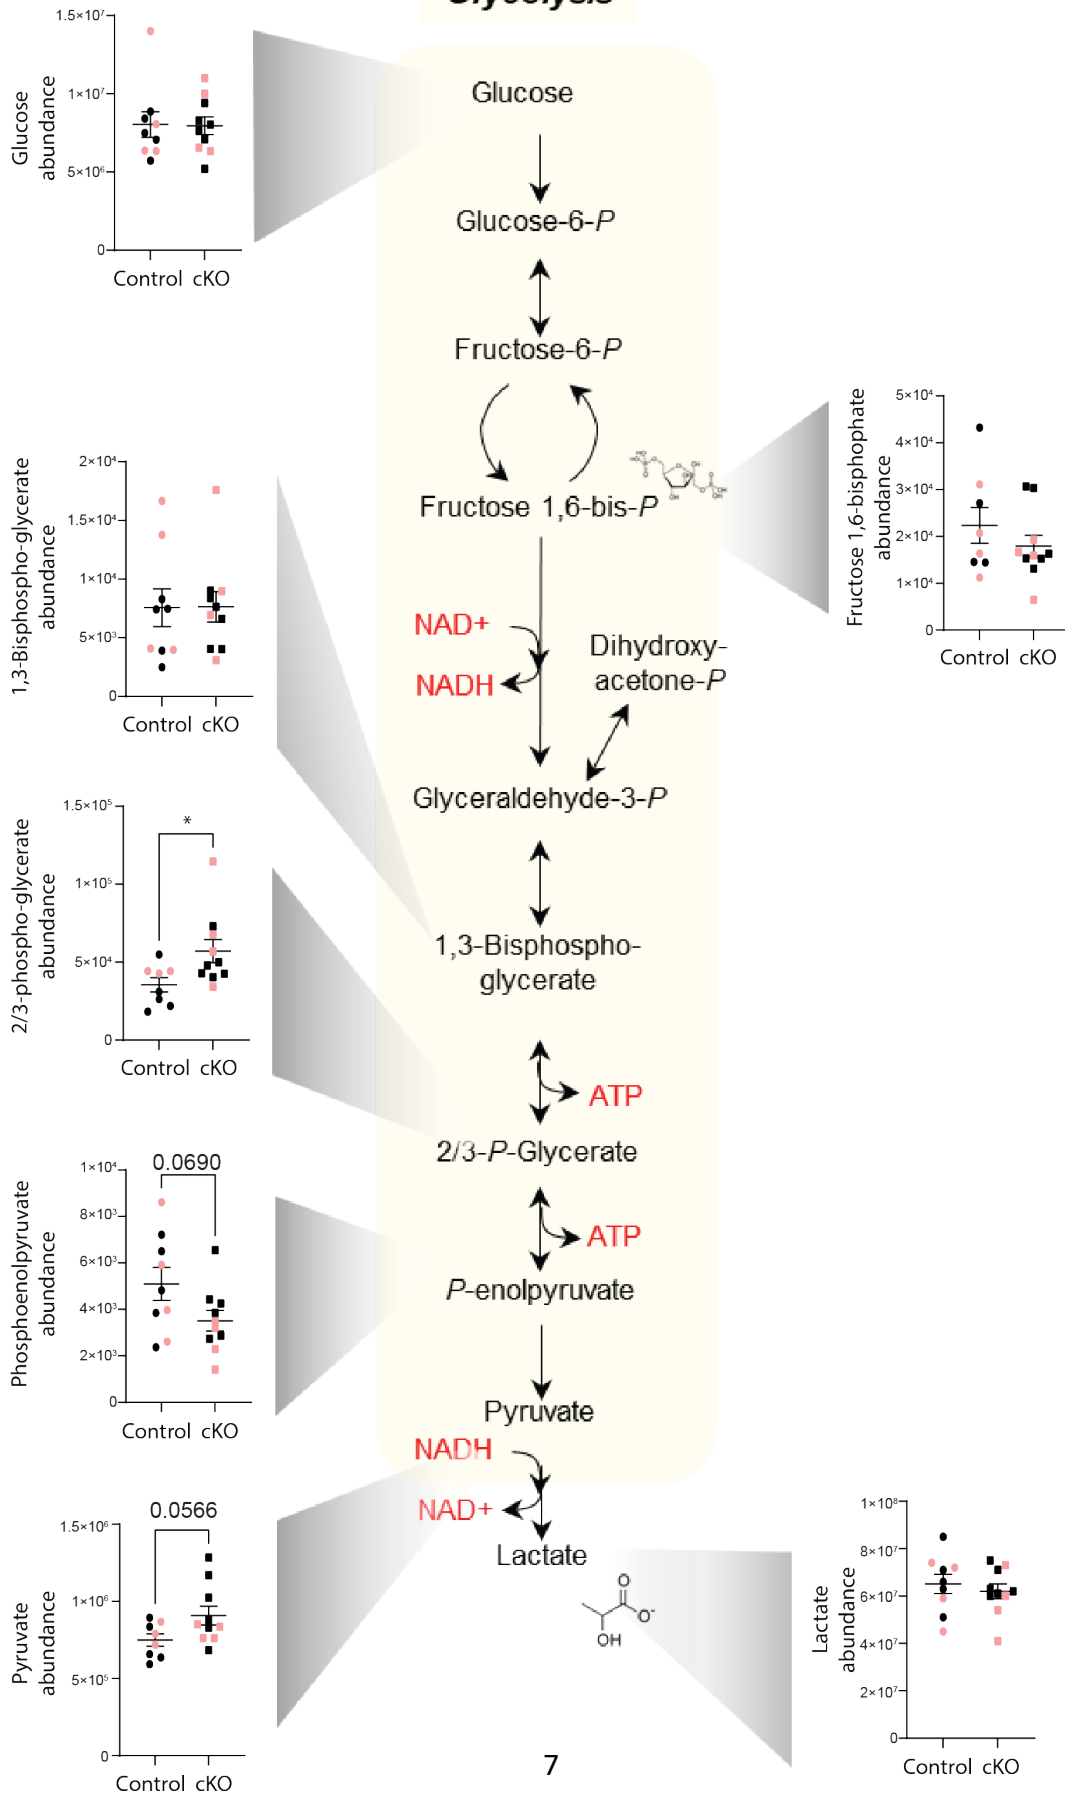

**Supplementary Figure 5: Loss of microglial MCT4 induces changes in the abundance of some glycolysis intermediates in the P15 hippocampus**

Abundance of glycolysis metabolites measured via LC-MS in the hippocampus of P15 mice. Controls: N=5 males; N=4 females. cKO: N=6 males; N=4 females. \*p(2/3-phospho-glycerate)=0.0339; two-tailed unpaired t-test.



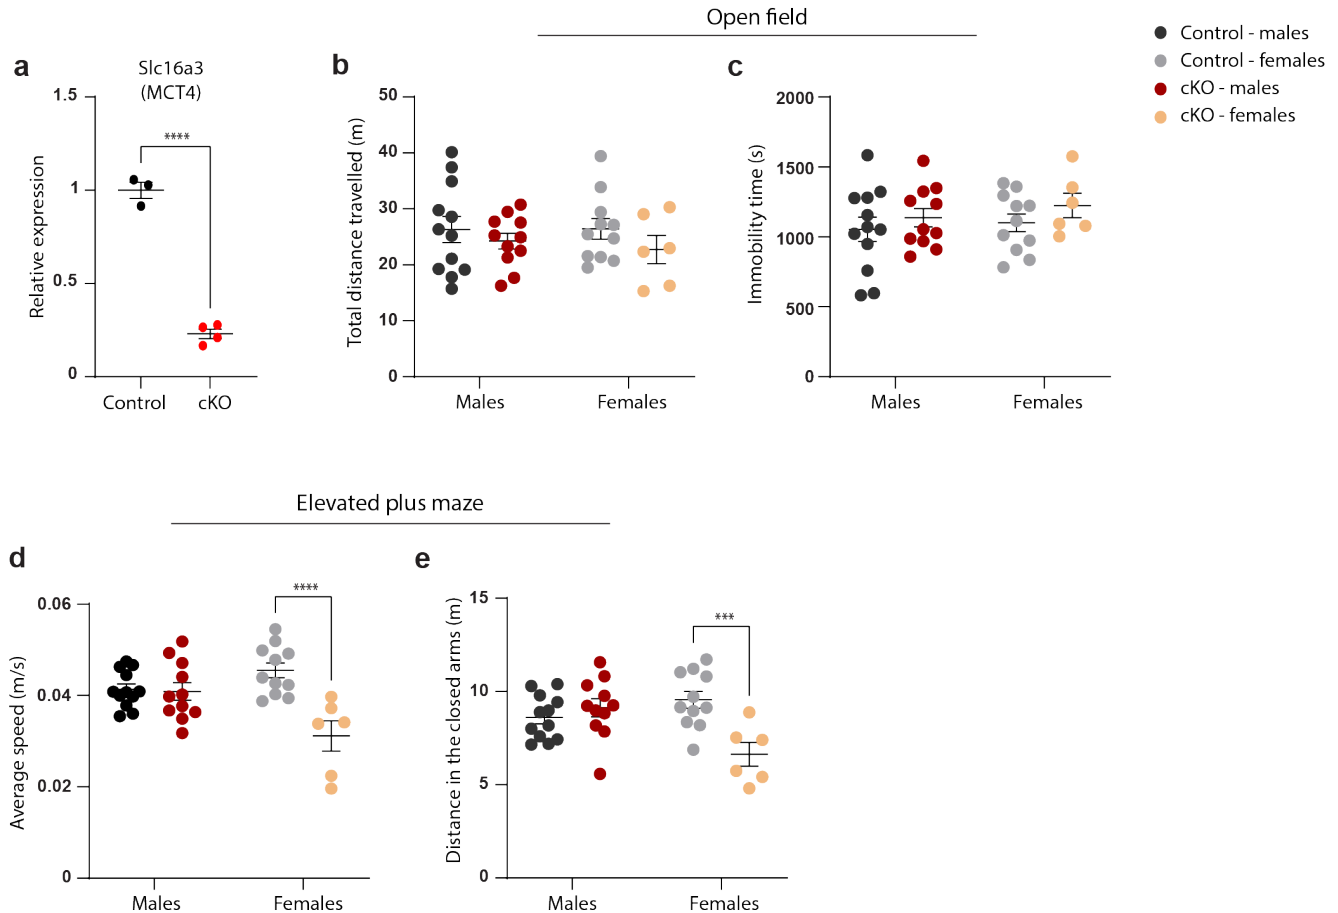

**Supplementary Figure 6: MCT4 is knock out in adult microglia upon early postnatal tamoxifen injection and adult cKO mice display anxiety-like behavioral alterations**

**(a)** Relative expression of Slc16a3 (MCT4) in microglia acutely isolated from adult mice (7-8 months). Two-tailed unpaired t-test, \*\*\*\* $p < 0.0001$ . **(b-e)** Behavioral characterization performed at 7-8 months. Each data point represents one animal. Control: N=12 males; N=11 females; cKO: N=11 males; N=6 females. Statistics are calculated with two-way ANOVA followed by Sidak's post hoc multiple comparison test. Open field exploration, with **(b)** quantification of total distance travelled in the arena and **(c)** total immobility time. Elevated plus maze test, with quantification of **(d)** average speed, \*\*\*\* $p(\text{females}) < 0.0001$ ; **(e)** distance travelled in the closed arms, \*\*\* $p(\text{females}) = 0.0006$ .

## Uncropped blots – Supplementary Figures

### Supplementary Figure 4

PSD95

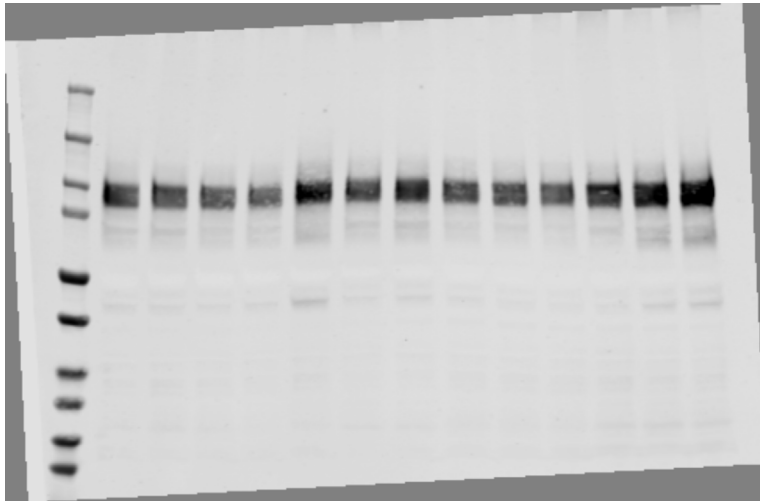

Total protein stain

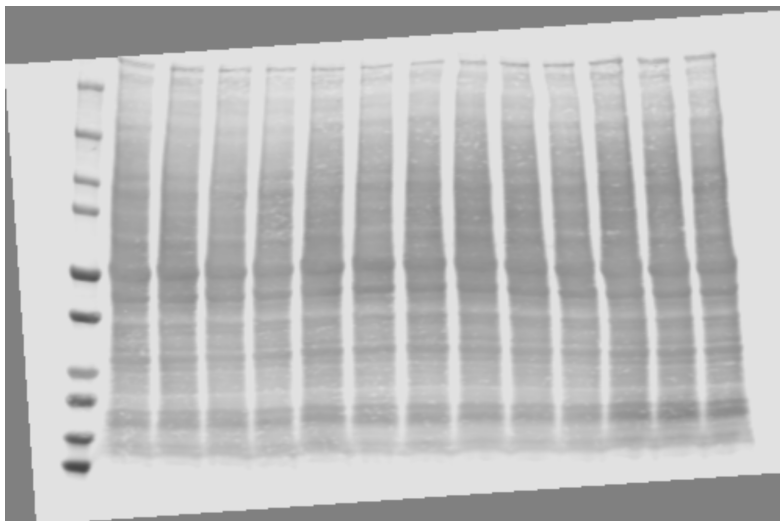

Supplement: 41467_2023_41502_MOESM1_ESM.pdf [file 41467_2023_41502_MOESM1_ESM.pdf]
